# Supplementary material for: Fedratinib, a newly approved treatment for patients with myeloproliferative neoplasm-associated myelofibrosis
Source: PubMed Central journal article supplement (PMC7787977; doi:10.1038/s41375-020-0954-2), 2020-07-09
Supplement: 41375_2020_954_MOESM1_ESM.pdf [file 41375_2020_954_MOESM1_ESM.pdf]

**Supplementary Table 1. Baseline characteristics among patients enrolled in JAKARTA or JAKARTA2<sup>34,71</sup>**

|                                                    | JAKARTA <sup>34</sup> |                                    | JAKARTA2 <sup>71</sup>             |
|----------------------------------------------------|-----------------------|------------------------------------|------------------------------------|
|                                                    | Placebo<br>(N=96)     | Fedratinib<br>400 mg/day<br>(N=96) | Fedratinib<br>400 mg/day<br>(N=97) |
| Age, years, median (range)                         | 66 (27-85)            | 63 (39-86)                         | 67 (38-83)                         |
| Male sex, n (%)                                    | 55 (57)               | 54 (56)                            | 53 (55)                            |
| MF subtype, n (%)                                  |                       |                                    |                                    |
| Primary                                            | 58 (60)               | 62 (65)                            | 53 (55)                            |
| Post-PV                                            | 27 (28)               | 24 (25)                            | 25 (26)                            |
| Post-ET                                            | 11 (12)               | 10 (10)                            | 19 (20)                            |
| IPSS risk status, n (%)                            |                       |                                    |                                    |
| Intermediate                                       | 46 (48)               | 57 (59)                            | 63 (65)                            |
| High                                               | 50 (52)               | 39 (41)                            | 34 (35)                            |
| Platelet count                                     |                       |                                    |                                    |
| Median (range)                                     | 187 (52-1075)         | 221 (31-1155)                      | NR                                 |
| 50 to < 100 × 10 <sup>9</sup> /L, n (%)            | 18 (19)               | 14 (15)                            | 33 (34)                            |
| ≥100 × 10 <sup>9</sup> /L, n (%)                   | 77 (80)               | 82 (85)                            | 64 (66)                            |
| Hemoglobin                                         |                       |                                    |                                    |
| Median, g/dL (range)                               | 10.1 (4.5-17.1)       | 10.7 (4.8-16.8)                    | NR                                 |
| < 10 g/dL, n (%)                                   | NR                    | NR                                 | 51 (53)                            |
| ≥ 10 g/dL, n (%)                                   | NR                    | NR                                 | 46 (47)                            |
| Spleen volume, cm <sup>3</sup> ,<br>median (range) | 2660 (662–7911)       | 2652 (316–6430)                    | 2894 (737–7815)                    |
| Palpable spleen size,<br>cm, median (range)        | 17 (5–40)             | 16 (5–40)                          | 18 (5–36)                          |
| JAK2 mutation status, n (%)                        |                       |                                    |                                    |
| Mutant                                             | 59 (62)               | 62 (65)                            | 61 (63)                            |
| Wild-type                                          | 32 (33)               | 30 (31)                            | 29 (30)                            |
| Missing                                            | 5 (5)                 | 4 (4)                              | 7 (7)                              |

ECOG, Eastern Cooperative Oncology Group; IPSS, International Prognostic Scoring System; MF, myelofibrosis; NR, not reported; post-ET, post-essential thrombocythemia; post-PV, post-polycythemia vera.

**Supplementary Table 2. Spleen volume response rates with fedratinib 400 mg at the end of treatment cycle 6 in the JAKARTA2 study, by outcome of prior ruxolitinib therapy, baseline platelet count, and baseline hemoglobin concentration<sup>71</sup>**

|                                                                                       | ITT Population<br>N=97                    |                                        | Stringent Criteria Cohort<br>n=79                   |                                        | Sensitivity Analysis Cohort<br>n=66                 |                                        |
|---------------------------------------------------------------------------------------|-------------------------------------------|----------------------------------------|-----------------------------------------------------|----------------------------------------|-----------------------------------------------------|----------------------------------------|
| <b>Prior ruxolitinib outcome</b>                                                      | <b>Resistant*</b><br>n=64                 | <b>Intolerant*</b><br>n=32             | <b>Relapsed/<br/>refractory<sup>†</sup></b><br>n=65 | <b>Intolerant<sup>†</sup></b><br>n=14  | <b>Relapsed/<br/>refractory<sup>†</sup></b><br>n=56 | <b>Intolerant<sup>†</sup></b><br>n=10  |
| <b>n (%)</b><br><b>[95% CI]</b>                                                       | 21 (33)<br>[22, 46]                       | 9 (28)<br>[ 14, 47]                    | 20 (31)<br>[20, 43]                                 | 4 (29)<br>[8, 58]                      | 20 (36)<br>[23, 50]                                 | 4 (40)<br>[12, 74]                     |
| <b>Baseline platelet count</b>                                                        | <b>&lt;100 × 10<sup>9</sup>/L</b><br>n=33 | <b>≥100 × 10<sup>9</sup>/L</b><br>n=64 | <b>&lt;100 × 10<sup>9</sup>/L</b><br>n=28           | <b>≥100 × 10<sup>9</sup>/L</b><br>n=51 | <b>&lt;100 × 10<sup>9</sup>/L</b><br>n=26           | <b>≥100 × 10<sup>9</sup>/L</b><br>n=40 |
| <b>n (%)</b><br><b>[95% CI]</b>                                                       | 12 (36)<br>[20, 55]                       | 18 (28)<br>[18, 41]                    | 11 (39)<br>[22, 59]                                 | 13 (26)<br>[14, 40]                    | 11 (42)<br>[23, 63]                                 | 13 (33)<br>[19, 49]                    |
| <b>Baseline hemoglobin concentration</b>                                              | <b>&lt;10 g/dL</b><br>n=51                | <b>≥10 g/dL</b><br>n=46                | <b>&lt;10 g/dL</b><br>n=46                          | <b>≥10 g/dL</b><br>n=33                | <b>&lt;10 g/dL</b><br>n=40                          | <b>≥10 g/dL</b><br>n=26                |
| <b>n (%)</b><br><b>[95% CI]</b>                                                       | 14 (28)<br>[16, 42]                       | 16 (35)<br>[21, 50]                    | 12 (26)<br>[14, 41]                                 | 12 (36)<br>[20, 55]                    | 12 (30)<br>[17, 47]                                 | 12 (46)<br>[27, 67]                    |
| *Per enrolling investigator. One patient was classified as “Other: lack of efficacy”. |                                           |                                        |                                                     |                                        |                                                     |                                        |
| †Relapsed/refractory or intolerant per updated stringent criteria.                    |                                           |                                        |                                                     |                                        |                                                     |                                        |

**Supplementary Table 3. JAKARTA2: treatment-emergent adverse events with fedratinib 400 mg reported in >10% of patients in the ITT Population, and hematology and biochemistry laboratory abnormalities of interest<sup>71</sup>**

|                                                                                                                                                                                                                                       | ITT Population (N=97) |                 | Stringent Criteria Cohort (n=79) |                 | Sensitivity Analysis Cohort (n=66) |                 |
|---------------------------------------------------------------------------------------------------------------------------------------------------------------------------------------------------------------------------------------|-----------------------|-----------------|----------------------------------|-----------------|------------------------------------|-----------------|
|                                                                                                                                                                                                                                       | Any Grade n (%)       | Grade 3–4 n (%) | Any Grade n (%)                  | Grade 3–4 n (%) | Any Grade n (%)                    | Grade 3–4 n (%) |
| <b>Preferred term</b>                                                                                                                                                                                                                 |                       |                 |                                  |                 |                                    |                 |
| Diarrhea                                                                                                                                                                                                                              | 60 (62)               | 4 (4)           | 51 (65)                          | 3 (4)           | 44 (67)                            | 3 (5)           |
| Nausea                                                                                                                                                                                                                                | 54 (56)               | 0               | 42 (53)                          | 0               | 35 (53)                            | 0               |
| Anemia                                                                                                                                                                                                                                | 47 (49)               | 37 (38)         | 44 (56)                          | 35 (44)         | 39 (59)                            | 31 (47)         |
| Thrombocytopenia                                                                                                                                                                                                                      | 26 (27)               | 21 (22)         | 21 (27)                          | 16 (20)         | 20 (30)                            | 15 (23)         |
| Vomiting                                                                                                                                                                                                                              | 40 (41)               | 0               | 35 (44)                          | 0               | 31 (47)                            | 0               |
| Constipation                                                                                                                                                                                                                          | 20 (21)               | 1 (1)           | 17 (22)                          | 0               | 15 (23)                            | 0               |
| Pruritus                                                                                                                                                                                                                              | 17 (18)               | 0               | 14 (18)                          | 0               | 12 (18)                            | 0               |
| Fatigue                                                                                                                                                                                                                               | 15 (16)               | 2 (2)           | 11 (14)                          | 1 (1)           | 10 (15)                            | 1 (2)           |
| Cough                                                                                                                                                                                                                                 | 13 (13)               | 0               | 12 (15)                          | 0               | 9 (14)                             | 0               |
| Headache                                                                                                                                                                                                                              | 13 (13)               | 1 (1)           | 10 (13)                          | 1 (1)           | 9 (14)                             | 1 (2)           |
| Urinary tract infection                                                                                                                                                                                                               | 12 (12)               | 0               | 11 (14)                          | 0               | 11 (17)                            | 0               |
| Abdominal pain                                                                                                                                                                                                                        | 12 (12)               | 2 (2)           | 9 (11)                           | 1 (1)           | 8 (12)                             | 1 (2)           |
| Dyspnea                                                                                                                                                                                                                               | 12 (12)               | 1 (1)           | 9 (11)                           | 1 (1)           | 8 (12)                             | 1 (2)           |
| Asthenia                                                                                                                                                                                                                              | 11 (11)               | 1 (1)           | 10 (13)                          | 1 (1)           | 7 (11)                             | 1 (2)           |
| Dizziness                                                                                                                                                                                                                             | 11 (11)               | 0               | 9 (11)                           | 0               | 7 (11)                             | 0               |
| Pyrexia                                                                                                                                                                                                                               | 11 (11)               | 1 (1)           | 7 (9)                            | 0               | 7 (11)                             | 0               |
| <b>Hematology,*</b>                                                                                                                                                                                                                   |                       |                 |                                  |                 |                                    |                 |
| Anemia                                                                                                                                                                                                                                | 96 (99)               | 45 (46)         | 79 (100)                         | 43 (54)         | 66 (100)                           | 37 (56)         |
| Thrombocytopenia                                                                                                                                                                                                                      | 68 (70)               | 23 (24)         | 58 (73)                          | 18 (23)         | 51 (77)                            | 16 (24)         |
| Neutrophil count decrease                                                                                                                                                                                                             | 23 (24)               | 7 (7)           | 22 (28)                          | 7 (9)           | 20 (30)                            | 7 (11)          |
| <b>Biochemistry,*</b>                                                                                                                                                                                                                 |                       |                 |                                  |                 |                                    |                 |
| Creatinine increased                                                                                                                                                                                                                  | 72 (74)               | 0               | 57 (72)                          | 0               | 48 (73)                            | 0               |
| AST increased                                                                                                                                                                                                                         | 46 (47)               | 1 (1)           | 39 (49)                          | 1 (1)           | 33 (50)                            | 1 (2)           |
| ALT increased                                                                                                                                                                                                                         | 44 (45)               | 2 (2)           | 41 (52)                          | 2 (3)           | 35 (53)                            | 2 (3)           |
| Lipase increased                                                                                                                                                                                                                      | 25 (26)               | 8 (8)           | 20 (25)                          | 6 (8)           | 17 (26)                            | 5 (8)           |
| Amylase increased                                                                                                                                                                                                                     | 17 (18)               | 3 (3)           | 15 (19)                          | 2 (3)           | 10 (15)                            | 2 (3)           |
| TEAEs were classified according to the Medical Dictionary for Regulatory Activities (MedDRA) version 20.1, and graded according to National Cancer Institute Common Terminology Criteria for Adverse Events (NCI-CTCAE) version 4.03. |                       |                 |                                  |                 |                                    |                 |
| NR, not reported; TEAE, treatment-emergent adverse event.                                                                                                                                                                             |                       |                 |                                  |                 |                                    |                 |
| *Hematologic and biochemical events (worst grade, including baseline) were assessed by laboratory analysis.                                                                                                                           |                       |                 |                                  |                 |                                    |                 |
| ALT, alanine aminotransferase; AST, aspartate aminotransferase                                                                                                                                                                        |                       |                 |                                  |                 |                                    |                 |
